# Supplementary material for: In silico studies on the origin of selective uptake of carbon dioxide with cucurbit[7]uril amorphous material
Source: Royal Society of Chemistry journal article supplement (doi:10.1039/c5ra13394g), 2015-01-01
Supplement: c5ra13394g1.pdf [file c5ra13394g1.pdf]

# Supporting Information

## In Silico Studies on the Origin of Selective Uptake of Carbon dioxide with Cucurbit[7]uril Amorphous Material

*Debashis Sahu and Bishwajit Ganguly\**

Computation and Simulation Unit, Analytical Discipline & Centralized Instrument Facility, and Academy of Scientific and Innovative Research, CSIR-Central Salt and Marine Chemicals Research Institute, Bhavnagar, Gujarat 364002, India

\*E-mail: [ganguly@csmcri.org](mailto:ganguly@csmcri.org). Fax: +91-278-2567562

### Contents:

- 1. Figure S1:** M06-2X/6-31G(d) calculated binding enthalpies of CO<sub>2</sub>, N<sub>2</sub> and CH<sub>4</sub> at the outer surface of the CB[7]uril.
- 2. Figure S2:** M06-2X/6-31G(d) calculated binding enthalpies (kcal/mol) of N<sub>2</sub> and CH<sub>4</sub> in presence of CO<sub>2</sub> inside the CB[7] cavity.
- 3. Table S1:** M06-2X/6-31G(d) calculated free energies of single CO<sub>2</sub>, N<sub>2</sub> and CH<sub>4</sub> gas molecule inside the CB[7] cavity.
- 4. Table S2:** Calculated binding enthalpies of single and double gas molecules inside the CB[7] cavity at PBEPBE/6-31G(d) and M06-2X-D3/6-31G(d) levels of theory.

**1 gas molecule outside the cavity of CB[7]**

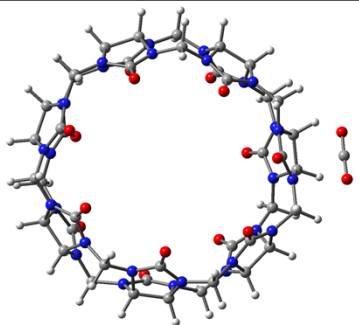

$\Delta H = -6.1$   
CB[7]+1CO<sub>2</sub>

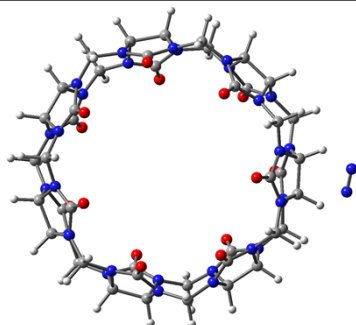

$\Delta H = -3.2$   
CB[7]+1N<sub>2</sub>

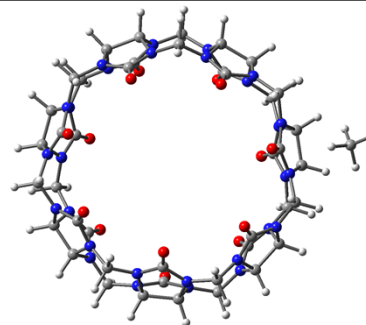

$\Delta H = -2.7$   
CB[7]+1CH<sub>4</sub>

**2 gas molecule outside the cavity of CB[7]**

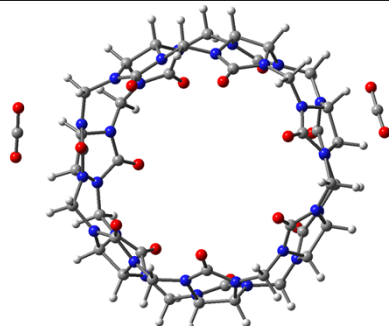

$\Delta H = -12.0, H_b = -6.0$   
CB[7]+2CO<sub>2</sub>

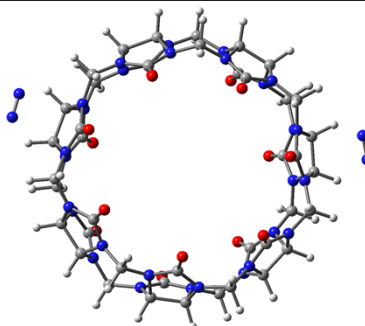

$\Delta H = -6.1, H_b = -3.0$   
CB[7]+2N<sub>2</sub>

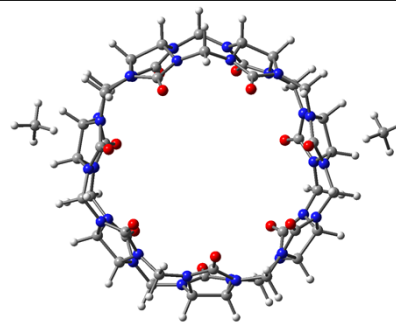

$\Delta H = -5.2, H_b = -2.6$   
CB[7]+2CH<sub>4</sub>

**3 gas molecule outside the cavity of CB[7]**

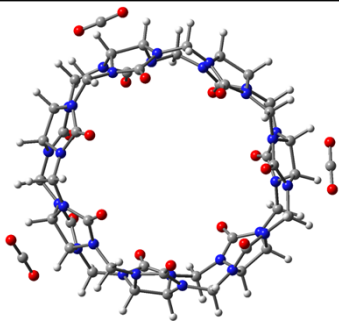

CB[7]+3CO<sub>2</sub>  
 $\Delta H = -13.6, H_b = -4.5$

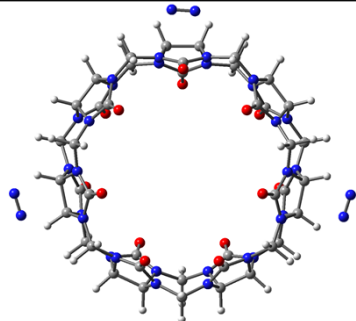

CB[7]+3N<sub>2</sub>  
 $\Delta H = -9.2, H_b = -3.1$

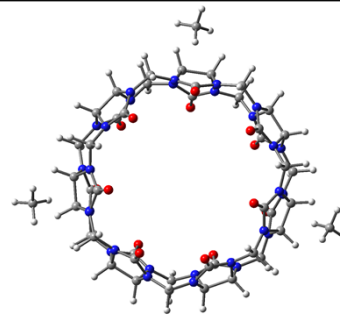

CB[7]+3CH<sub>4</sub>  
 $\Delta H = -8.0, H_b = -2.7$

**Figure S1:** M06-2X/6-31G(d) calculated binding enthalpies (kcal/mol) of CO<sub>2</sub>, N<sub>2</sub> and CH<sub>4</sub> towards CB[7]uril and their corresponding average binding enthalpies (H<sub>b</sub>) (kcal/mol).

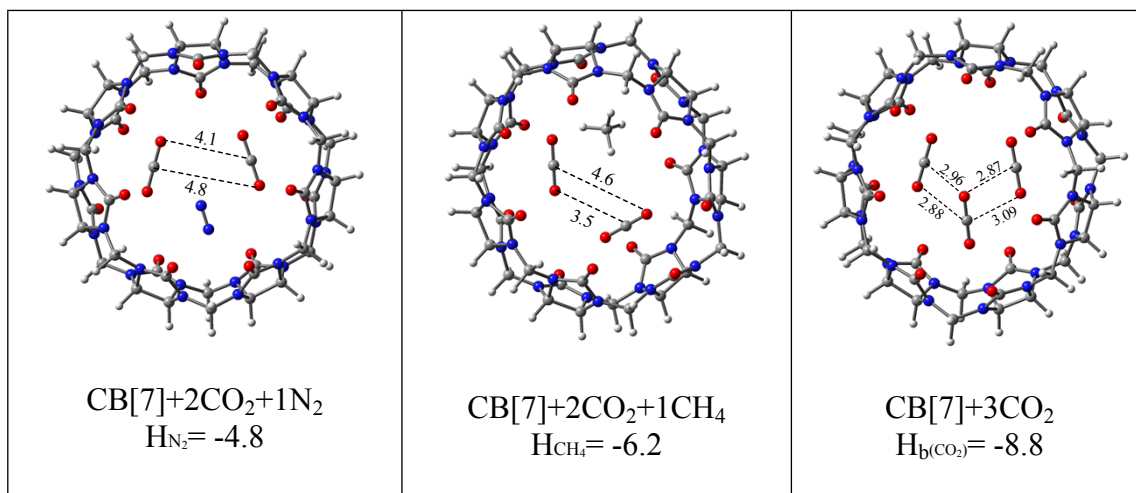

**Figure S2:** M06-2X/6-31G(d) calculated binding enthalpies (kcal/mol) of N<sub>2</sub> and CH<sub>4</sub> in presence of CO<sub>2</sub> inside the CB[7] cavity. The energies are in kcal/mol.

**Table S1:** M06-2X/6-31G(d) calculated free energies, ΔG (kcal/mol) of single and double gas molecule(s) (CO<sub>2</sub>, N<sub>2</sub> and CH<sub>4</sub>) inside the CB[7] cavity at 273 K and 298 K.

|                                | ΔG (273K) | ΔG (298K) |
|--------------------------------|-----------|-----------|
| 1 CO <sub>2</sub> inside CB[7] | 0.8       | 1.6       |
| 1 N <sub>2</sub> inside CB[7]  | 3.6       | 4.0       |
| 1 CH <sub>4</sub> inside CB[7] | 2.3       | 2.9       |
| 2 CO <sub>2</sub> inside CB[7] | 1.6       | 3.4       |
| 2 N <sub>2</sub> inside CB[7]  | 4.3       | 5.6       |
| 2 CH <sub>4</sub> inside CB[7] | 5.8       | 7.3       |

**Table S2:** Calculated adsorption enthalpies ( $\Delta H$ , kcal/mol) of single and double gas molecules ( $\text{CO}_2$ ,  $\text{N}_2$  and  $\text{CH}_4$ ) inside the CB[7] cavity at PBEPBE/6-31G(d) and M06-2X-D3/6-31G(d) levels of theory.

|                              | $\Delta H$ [PBEPBE/6-31G(d)] | $\Delta H$ [M06-2X-D3/6-31G(d)] |
|------------------------------|------------------------------|---------------------------------|
| 1 $\text{CO}_2$ inside CB[7] | -3.1                         | -10.0                           |
| 1 $\text{N}_2$ inside CB[7]  | -1.3                         | -5.7                            |
| 1 $\text{CH}_4$ inside CB[7] | -1.7                         | -6.6                            |
| 2 $\text{CO}_2$ inside CB[7] | -6.3                         | -20.2                           |
| 2 $\text{N}_2$ inside CB[7]  | -2.8                         | -11.8                           |
| 2 $\text{CH}_4$ inside CB[7] | -2.7                         | -13.1                           |
